# Supplementary material for: Socioeconomic Status, Frailty, and All-Cause Mortality in Korean Older Adults: A 3-Year Population-Based Prospective Study
Source: Hindawi journal article supplement (doi:10.1155/2017/1903589), 2017-01-01
Supplement: f1 [file 1903589.f1.pdf]

Supplementary table 1. Frailty criteria used in the study

|                                                                        | Total, n (%) |
|------------------------------------------------------------------------|--------------|
| Weight loss of >5kg                                                    | 261 (3.8)    |
| Exhaustion                                                             | 1,627 (23.5) |
| Lowest 20% in BMI-specific hand-grip strength in this study population | 1,337 (19.3) |
| Men:                                                                   |              |
| Strength $\leq 21.0\text{kg}$ for BMI $\leq 21.02\text{kg/m}^2$        |              |
| Strength $\leq 23.0\text{kg}$ for BMI 21.03-22.98 $\text{kg/m}^2$      |              |
| Strength $\leq 25.0\text{kg}$ for BMI 22.99-24.88 $\text{kg/m}^2$      |              |
| Strength $\leq 25.5\text{kg}$ for BMI $\geq 24.89\text{kg/m}^2$        |              |
| Women:                                                                 |              |
| Strength $\leq 13.0\text{kg}$ for BMI $\leq 21.67\text{kg/m}^2$        |              |
| Strength $\leq 14.8\text{kg}$ for BMI 21.68-23.77 $\text{kg/m}^2$      |              |
| Strength $\leq 15.0\text{kg}$ for BMI 23.78-25.97 $\text{kg/m}^2$      |              |
| Strength $\leq 15.0\text{kg}$ for BMI $\geq 25.98\text{kg/m}^2$        |              |
| Slowest 20% in height-specific gait speed                              | 1,360 (19.6) |
| Men:                                                                   |              |
| $\leq 0.49\text{m/s}$ for height $\leq 165.0\text{cm}$                 |              |
| $\leq 0.50\text{m/s}$ for height $\geq 165.1\text{cm}$                 |              |
| Women:                                                                 |              |
| $\leq 0.42\text{m/s}$ for height $\leq 151.9\text{cm}$                 |              |
| $\leq 0.44\text{m/s}$ for height $\geq 152.0\text{cm}$                 |              |
| Lowest 20% in physical activity scale for the elderly                  | 1,279 (18.5) |
| Men: $\leq 525.5\text{kcal}$                                           |              |
| Women: $\leq 321.1\text{kcal}$                                         |              |
| BMI: body mass index                                                   |              |
